# Supplementary material for: Endocan as a Potential Marker for Predicting All-Cause Mortality in Hemodialysis Patients
Source: MDPI journal article supplement (doi:10.3390/jcm12237427), 2023-11-30
Supplement: s1 [file s1]

**Supplement Table S1.** multivariate regression analysis of related risk of mortality

| variables  | odds ratio | 95% CI       | <i>p value</i> |
|------------|------------|--------------|----------------|
| albumin    | 0.813      | 0.251-2.631  | 0.730          |
| creatinine | 0.751      | 0.557-1.014  | 0.062          |
| Sex        | 1.487      | 0.616-3.589  | 0.377          |
| DM         | 1.760      | 0.738-4.199  | 0.202          |
| Endocan    | 3.870      | 1.458-10.268 | 0.007*         |
| age        | 1.037      | 1.000-1.076  | 0.051          |
| ARB        | 1.539      | 0.558-4.100  | 0.389          |
| Statin     | 0.504      | 0.116-2.192  | 0.361          |
| CCB        | 0.481      | 0.173-1.338  | 0.161          |

DM: diabetic mellitus; ARB: angiotensin receptor blocker; CCB: calcium channel blocker. \*  $p < 0.05$  was considered statistically significant.
